1 **Title: Trends and factors associated with initiation of HIV treatment and**  
2 **uptake of viral load testing among PLHIV in Jamaica**

3 Anya Cushnie<sup>1¶\*</sup>, Ralf Reintjes<sup>1, 2¶</sup>, Miia Artama<sup>1¶</sup>, J. Peter Figueroa<sup>3¶</sup>

4  
5 1 Unit of Health Sciences, Faculty of Social Sciences, Tampere University, Tampere, Finland

6 2 Department of Health Sciences, Hamburg University of Applied Sciences, Hamburg, Germany:

7 3 Department of Community Health and Psychiatry, University of the West Indies, Mona, Jamaica

8  
9 \* Corresponding author: Anya Cushnie

10 Email: [anya.cushnie@gmail.com](mailto:anya.cushnie@gmail.com) (AC)

11  
12 ¶ These authors contributed to this work.

13  
14  
15 (Word Count=3100)

16

17 **Abstract:**

18 **Introduction:** Jamaica did not achieve the UNAIDS 90-90-90 targets in 2020. This study aims to  
19 examine trends and factors associated with uptake of HIV treatment and viral load testing among  
20 people living with HIV (PLHIV) in Jamaica, to make recommendations for improving patient  
21 management and outcomes. **Methods:** This secondary analysis uses patient-level data from the  
22 National Treatment Service Information System. The baseline sample is PLHIV initiating anti-  
23 retroviral treatment (ART) between January 2015-December 2019. Descriptive statistics are used  
24 to summarize demographic and clinical variables. Multivariable logistic regression is used to  
25 assess factors associated with ART initiation (31+ days vs. same day) and viral load testing uptake  
26 (viral load test vs. no test), using categorical variables for age group, gender and regional health  
27 authority. Adjusted odds ratios and 95% confidence intervals are reported. **Results:** Same day  
28 ART initiation increased by 72% over 5 years. The coverage of 1<sup>st</sup> viral load test was 90% but  
29 declined to 79% for the 2<sup>nd</sup> test. Testing occurred mostly after 0-6 months on ART (n=3047, 55%)  
30 and uptake was highest in the South-East Region (n=2885, 53%). Those virally suppressed were  
31 significantly more likely to have same day ART initiation compared to those non-suppressed  
32 (aOR=1.58, CI=1.43-1.75). Males were significantly more likely to have same day ART initiation  
33 (aOR=1.46, CI=1.32-1.62) but no first viral load test (aOR=1.55, CI=1.27-1.90) compared to  
34 females. **Conclusion:** The goal of immediate ART initiation is increasingly being met and is  
35 significantly associated with viral suppression at the first viral load test. Males were less likely to  
36 have a viral load test after ART initiation. A qualitative assessment should be conducted to  
37 understand important challenges faced to access routine viral load testing, followed by  
38 implementation of differentiated service care models, targeting males.

39 Abstract Word Count:286

40 **Introduction:**

41 At the end of 2019, Jamaica had an adult HIV prevalence of 1.5% and an estimated number of  
42 32,000 persons living with HIV (PLHIV)[1]. With regards to the second and third UNAIDS 90-  
43 90-90 targets which aim to retain 90% of PLHIV diagnosed on antiretroviral therapy (ART) and  
44 ensure that 90% of people receiving ART are virologically suppressed by 2020[2], the country has  
45 achieved 44% ART retention and 35% virological suppression[3]. Jamaica is lagging considerably  
46 and did not achieve the UNAIDS targets in 2020[4].

47  
48 The Government of Jamaica has provided public access to HIV treatment since 2004[1]. Jamaica  
49 also implemented the WHO Treat All strategy in January 2017[5] and a key objective is immediate  
50 initiation of ART following HIV diagnosis, regardless of clinical status[6,7]. Despite these efforts  
51 to broaden access, a vast majority of PLHIV are still not on treatment[8]. A number of randomized  
52 trials have demonstrated multiple benefits of rapid ART initiation compared to later ART start,  
53 including improved ART uptake, increased retention in care, higher rates of viral suppression and  
54 reduced risk of mortality[9,10].

55  
56 There are several barriers to scale up of viral load (vl) testing in low and middle income countries,  
57 such as limited laboratory resources, missed appointments or infrequent measurements[11]. Viral  
58 load testing in Jamaica has reportedly been suboptimal due to non-adherence to testing protocols  
59 as well as laboratory-based challenges[1]. Viral load testing coverage declined from 53% in  
60 December 2019 to 45% in June 2020 [12], three months after COVID-19 protocols, including stay  
61 at home orders, were implemented locally. The viral load in patients receiving ART is the best  
62 predictor of treatment outcomes[13] but assessing patients with missing test results is also useful

63 to identify appropriate factors that may impede uptake of viral load testing and achieving the  
64 suppression target as well as improve the quality of patient management.

65  
66 The Ministry of Health and Wellness (MoHW) has earmarked the year 2025 for achievement of  
67 the 90-90-90 targets[1]. For this to occur, an analysis of factors associated with ART and viral load  
68 uptake was recommended in the recent National HIV Strategic Plan. This study aims to describe  
69 PLHIV who accessed ART and viral load testing and assess factors associated with uptake of ART  
70 and viral load testing.

### 71 **Methods:**

72 This secondary analysis uses the National Treatment Service Information System (TSIS2). TSIS2  
73 is a centralized case-based database, governed by the MoHW and currently being used by all HIV  
74 treatment sites in Jamaica. TSIS2 stores patient level demographic and clinical data using over 100  
75 variables.

76 The MoHW Internal Review Board provided ethical approval (Study No: 2017/20). The dataset  
77 was extracted by the MoHW and fully anonymized before sharing with the study investigator, as  
78 a result patient consent was waived.

### 79 **Sample Population**

80 The baseline sample was a total of 8363 PLHIV who initiated HIV treatment between January  
81 2015 and December 2019. For the analytical sample (n=8149), persons in the age group <15 years  
82 (n= 215) were excluded because of the small sample size compared to other age categories. To  
83 assess viral load testing uptake, the sample included only those eligible within the study period.

84

85

## 86 **Data Analysis**

87 Descriptive statistics were used to summarise demographic and clinical variables. The categorical  
88 factors evaluated included age group, gender, location by regional health authority (RHA) and first  
89 viral load test (vl) status (suppressed or non-suppressed) as defined by the *National Clinical*  
90 *Management of HIV Disease Guidelines*[5]. We assessed two primary outcomes:

91 a.) Time to ART initiation based on the difference between the first clinic date and the ART  
92 initiation date. If these dates were the same, patients were classified as having same-day ART  
93 initiation. ART initiation time/days is reported using six categories (preclinic, same day, 1-7, 8-  
94 21, 22-30 and 31+).

95 b.) Time to the first viral load test determined by the duration between the first ART date and the  
96 first viral load test date. Time to viral load testing/months is reported using four categories  
97 (baseline or pre-ART, 0-6, 7-12 and 13+).

98 Multivariable logistic regression was used to assess factors associated with ART initiation (31+  
99 days vs. same day initiation) and the uptake of viral load testing (viral load test vs. no viral load  
100 test). We report adjusted odds ratios and confidence intervals.

## 101 **Results**

### 102 **Data summary**

103  
104 The analytical sample (Table 1) showed those initiating treatment were more likely to be female  
105 (n=4408, 54%), 20-39 years (n=4407, 53%) and located in the South East Region (SERHA  
106 (n=4141, 51%). Most were diagnosed at an early HIV stage (n=4430, 60%) and initiated ART at  
107 either 31+ days after the first clinic visit (n=3666, 45%) or the same day (n=3463, 43%). The  
108 median time to ART initiation was 15 days and most were virally non-suppressed (n=3713, 53%)

109 at the first viral load test. The first viral load tests were mainly done between 0-6 months (n=3047,  
 110 37%).

111  
 112 **Table 1. Demographic and clinical characteristics for the analytical sample of PLHIV on**  
 113 **HIV treatment, from 2015-2019 in Jamaica (N=8149).**

| <b>Variables</b>                                        |                                            |          |          |
|---------------------------------------------------------|--------------------------------------------|----------|----------|
|                                                         | <b>Levels</b>                              | <b>N</b> | <b>%</b> |
| <b>Gender</b>                                           |                                            |          |          |
|                                                         | Female                                     | 4408     | 54       |
|                                                         | Male                                       | 3739     | 46       |
|                                                         | <i>Missing</i>                             | 2        |          |
| <b>Age group at ART initiation/years</b>                |                                            |          |          |
|                                                         | Mean(sd)                                   | 38(13)   |          |
|                                                         | 15-19                                      | 400      | 5        |
|                                                         | 20-39                                      | 4407     | 53       |
|                                                         | 40+                                        | 3342     | 40       |
|                                                         | <i>Missing</i>                             | 51       |          |
| <b>Regional Health Authority (RHA)</b>                  |                                            |          |          |
|                                                         | South East (SERHA)                         | 4141     | 51       |
|                                                         | Western (WRHA)                             | 1875     | 23       |
|                                                         | North East (NERHA)                         | 1124     | 14       |
|                                                         | Southern (SRHA)                            | 1009     | 12       |
| <b>HIV stage at diagnosis <sup>b</sup></b>              |                                            |          |          |
|                                                         | early diagnosis                            | 4430     | 60       |
|                                                         | late diagnosis                             | 2941     | 40       |
|                                                         | <i>Missing</i>                             | 778      |          |
| <b>ART initiation time/days<sup>c</sup></b>             |                                            |          |          |
|                                                         | Median time to ART initiation(IQR)         | 15 (449) |          |
|                                                         | preclinic                                  | 277      | 4        |
|                                                         | same day                                   | 3463     | 43       |
|                                                         | 1-7                                        | 201      | 2        |
|                                                         | 8-21                                       | 282      | 3        |
|                                                         | 22-30                                      | 260      | 3        |
|                                                         | 31+                                        | 3666     | 45       |
| <b>Time to first viral load test/months<sup>d</sup></b> |                                            |          |          |
|                                                         | Median time to first viral load test (IQR) | 0.1(8)   |          |

|                                                               |             |    |
|---------------------------------------------------------------|-------------|----|
| baseline test (pre-ART)                                       | 2739        | 34 |
| 0-6                                                           | 3047        | 37 |
| 7-12                                                          | 792         | 10 |
| 13+                                                           | 447         | 5  |
| no viral load test                                            | 1124        | 14 |
| <b>Viral load status at first viral load test<sup>e</sup></b> |             |    |
| Median first viral load result (IQR)                          | 1655(35663) |    |
| non-suppressed                                                | 3713        | 53 |
| suppressed                                                    | 3312        | 47 |
| <i>Missing</i>                                                | 1124        |    |

- 114 a) Percentages have been rounded up  
 115 b) Based on baseline CD4 test results: Patients starting ART with CD4 cell count  $\geq 350$  cells/mm<sup>3</sup>  
 116 were characterized as achieving early diagnosis, while CD4 <350 cells/mm<sup>3</sup> was defined as late  
 117 diagnosis.  
 118 c) Time/days to ART initiation is the time from first clinic date to ART initiation.  
 119 d) Time/months to first viral load test is the time from ART initiation to first viral load test  
 120 e) Based on the first viral load test after initiating treatment, followed by categorization according to  
 121 the first viral load test results at that time period (<1000 copies/mL versus  $\geq 1000$  copies/mL).  
 122

### 123 ART initiation time

124 Figure 1 shows the proportion of PLHIV with same day ART initiation increased steadily each  
 125 year from 32% in 2015 to 55% in 2019. This represents a 72% increase over 5 years or a 37.5%  
 126 increase since the implementation of the “Treat All” strategy in 2017.

### 127 Fig 1. Proportion of PLHIV in Jamaica with same day ART initiation between 2015-2019.

128  
 129 Table 2. shows for persons with same day ART initiation (N= 3461), there was no difference  
 130 between genders or HIV stage of diagnosis. Most persons were 20-39 years old (n=1817, 53%)  
 131 and had achieved viral suppression at the first viral load test (n=1477, 53%). For persons initiating  
 132 ART 31+ days after the first clinic visit (n=3666), most were diagnosed at an early stage (n=2611,  
 133 71%) but were virally non-suppressed (n=1965, 58%) at the first viral load test.

134

135 **Table 2. Demographic and clinical characteristics of PLHIV by ART initiation time, for**  
 136 **2015-2019.**

| Variables                                               |                    | Time to ARV initiation/days <sup>c</sup> |                         |                 |                  |                   |                 | P      |
|---------------------------------------------------------|--------------------|------------------------------------------|-------------------------|-----------------|------------------|-------------------|-----------------|--------|
|                                                         |                    | Preclinic<br>n<br>(%)                    | same<br>day<br>n<br>(%) | 1-7<br>n<br>(%) | 8-21<br>n<br>(%) | 22-30<br>n<br>(%) | 31+<br>n<br>(%) |        |
| <b>Gender</b>                                           | Female             | 156<br>(56%)                             | 1733<br>(50%)           | 91<br>(45%)     | 139<br>(49%)     | 128<br>(49%)      | 2161<br>(59%)   | <0.001 |
|                                                         | Male               | 121<br>(44%)                             | 1728<br>(50%)           | 110<br>(55%)    | 143<br>(51%)     | 132<br>(51%)      | 1505<br>(41%)   |        |
|                                                         | <i>Missing</i>     |                                          | 2                       |                 |                  |                   |                 |        |
| <b>Age<br/>group/year<br/>s<sup>b</sup></b>             | 15-19              | 21<br>(8%)                               | 226<br>(7%)             | 15<br>(8%)      | 15<br>(5%)       | 17<br>(7%)        | 106<br>(3%)     | <0.001 |
|                                                         | 20-39              | 131<br>(47%)                             | 1817<br>(53%)           | 111<br>(55%)    | 151<br>(54%)     | 123<br>(47%)      | 2074<br>(57%)   |        |
|                                                         | 40+                | 125<br>(45%)                             | 1420<br>(40%)           | 75<br>(37%)     | 116<br>(41%)     | 120<br>(46%)      | 1486<br>(40%)   |        |
| <b>RHA</b>                                              | North East         | 28<br>(10%)                              | 446<br>(13%)            | 58<br>(29%)     | 72<br>(26%)      | 54<br>(21%)       | 466<br>(13%)    | <0.001 |
|                                                         | South East         | 133<br>(48%)                             | 1735<br>(50%)           | 88<br>(44%)     | 128<br>(45%)     | 136<br>(52%)      | 1921<br>(52%)   |        |
|                                                         | Southern           | 22<br>(8%)                               | 436<br>(13%)            | 22<br>(11%)     | 23<br>(8%)       | 17<br>(7%)        | 489<br>(13%)    |        |
|                                                         | Western            | 94<br>(34%)                              | 846<br>(24%)            | 33<br>(16%)     | 59<br>(21%)      | 53<br>(20%)       | 790<br>(22%)    |        |
| <b>HIV stage<br/>at<br/>diagnosis<sup>d</sup></b>       | early              | 101<br>(41%)                             | 1418<br>(49%)           | 82<br>(46%)     | 107<br>(42%)     | 111<br>(47%)      | 2611<br>(71%)   | <0.001 |
|                                                         | late               | 146<br>(59%)                             | 1498<br>(51%)           | 95<br>(54%)     | 146<br>(58%)     | 124<br>(53%)      | 932<br>(29%)    |        |
|                                                         | <i>Missing</i>     | 30                                       | 547                     | 24              | 29               | 25                | 123             |        |
| <b>First viral<br/>load test<br/>status<sup>e</sup></b> | suppressed         | 129<br>(53%)                             | 1477<br>(53%)           | 82<br>(50%)     | 118<br>(49%)     | 131<br>(56%)      | 1375<br>(42%)   | <0.001 |
|                                                         | non-<br>suppressed | 113<br>(47%)                             | 1329<br>(47%)           | 81<br>(50%)     | 123<br>(51%)     | 102<br>(44%)      | 1965<br>(58%)   |        |
|                                                         | <i>Missing</i>     | 35                                       | 657                     | 38              | 41               | 27                | 326             |        |

- 137 a) Percentages have been rounded up  
 138 b) Persons <15 years were excluded because of small sample size  
 139 c) Time/days to ART initiation is the time from first clinic date to ART initiation.



- 140 d) Based on baseline CD4 test results: Patients starting ART with CD4 cell count  $\geq 350$  cells/mm<sup>3</sup>  
 141 were characterized as achieving early diagnosis, while CD4 <350 cells/mm<sup>3</sup> was defined as late  
 142 diagnosis.  
 143 e) Based on the first viral load test after initiating treatment, followed by categorization according to  
 144 the first viral load test results at that time period (<1000 copies/mL versus  $\geq 1000$  copies/mL).  
 145

146 **Uptake of viral load testing**

147 Figure 2. shows of persons who were eligible for a 1<sup>st</sup> viral load test (n=6836), 90% (n=6146) had  
 148 a test documented and 79% (n=4827) of those had a second viral load test documented. Only 10%  
 149 (n=690) did not have a first viral load test recorded in TSIS2 despite being eligible to receive  
 150 testing. Persons were excluded (n=2003) because viral load testing was done before the study  
 151 period or they were not yet eligible for testing based on the national guidelines.

152 **Fig 2. Viral load testing uptake among PLHIV on ART in Jamaica, from 2015-2019.**

153  
 154 Table 3. shows among persons with a first viral load test (n=6146), most were female, 20-39 years  
 155 old at the time of treatment and diagnosed at early HIV stage. Uptake of vl testing was highest in  
 156 SERHA and lowest in SRHA. Viral load testing was mostly done after 0-6 months on HIV  
 157 treatment (n=3034, 44%). However, 28% (n=1878) received a baseline vl test before starting  
 158 treatment. Those with a baseline viral load test were mostly non-suppressed (n=1442, 77%) at the  
 159 first viral load test. Those without a vl test were mostly males, 20-39 years old, diagnosed early  
 160 and located in SERHA.

161 **Table 3. Demographic and clinical characteristics for PLHIV on HIV treatment by time to**  
 162 **uptake of first viral load test.**

163

| Variables     |        | Time to first viral load test/months <sup>b</sup> |               |               |              |                  | P      |
|---------------|--------|---------------------------------------------------|---------------|---------------|--------------|------------------|--------|
|               |        | baseline<br>(pre-ART)<br>n (%)                    | 0-6<br>n (%)  | 7-12<br>n (%) | 13+<br>n (%) | no test<br>n (%) |        |
| <b>Gender</b> | Female | 1057<br>(56%)                                     | 1591<br>(52%) | 390<br>(49%)  | 217<br>(48%) | 325<br>(47%)     | <0.001 |

|                                                 |                |               |               |              |              |              |        |
|-------------------------------------------------|----------------|---------------|---------------|--------------|--------------|--------------|--------|
|                                                 | Male           | 821 (44%)     | 1443<br>(48%) | 398<br>(51%) | 229<br>(52%) | 364<br>(53%) |        |
|                                                 | <i>Missing</i> |               |               |              |              | 1            |        |
| <b>Age group/year</b>                           | 15-19          | 93 (5%)       | 146 (5%)      | 38 (5%)      | 27 (6%)      | 58 (8%)      | <0.001 |
|                                                 | 20-39          | 1011(54%)     | 1619<br>(53%) | 401<br>(51%) | 256<br>(57%) | 403<br>(58%) |        |
|                                                 | 40+            | 774(41%)      | 1269<br>(42%) | 349<br>(44%) | 163<br>(37%) | 229<br>(34%) |        |
| <b>RHA</b>                                      | North East     | 346 (18%)     | 399<br>(13%)  | 87<br>(11%)  | 45<br>(10%)  | 72 (10%)     | <0.001 |
|                                                 | South East     | 900 (48%)     | 1720<br>(57%) | 337<br>(43%) | 210<br>(47%) | 336(48%)     |        |
|                                                 | Southern       | 268 (14%)     | 302<br>(10%)  | 75 (9%)      | 34 (8%)      | 94 (16%)     |        |
|                                                 | Western        | 364 (20%)     | 613<br>(20%)  | 289<br>(37%) | 157<br>(35%) | 188<br>(26%) |        |
| <b>HIV stage at diagnosis<sup>c</sup></b>       | early          | 1105<br>(61%) | 1527<br>(54%) | 411<br>(55%) | 210<br>(49%) | 271<br>(64%) | <0.001 |
|                                                 | late           | 711 (39%)     | 1326<br>(46%) | 334<br>(45%) | 215<br>(51%) | 150<br>(36%) |        |
| <b>First viral load test status<sup>d</sup></b> | suppressed     | 436 (23%)     | 1819<br>(60%) | 576<br>(74%) | 226<br>(51%) | NA           | <0.001 |
|                                                 | non-suppressed | 1442<br>(77%) | 1215<br>(40%) | 212<br>(26%) | 220<br>(49%) | NA           |        |

- 164 a) Percentages have been rounded up  
 165 b) Time/months to first viral load test is the time from ART initiation to first viral load test  
 166 c) Based on baseline CD4 test results: Patients starting ART with CD4 cell count  $\geq 350$  cells/mm<sup>3</sup>  
 167 were characterized as achieving early diagnosis, while CD4 <350 cells/mm<sup>3</sup> was defined as late  
 168 diagnosis.  
 169 d) Based on the first viral load test after initiating treatment, followed by categorization according to  
 170 the first viral load test results at that time period (<1000 copies/mL versus  $\geq 1000$  copies/mL).

### 171 **Factors associated with ART initiation and viral load testing uptake**

172 In Figure 3, same day ART initiation was significantly more likely for males compared to females  
 173 (aOR=1.46, CI=1.32-1.62), 15 - 19 years old compared to 20 - 39 years olds and individuals from  
 174 WRHA compared to the ones from SERHA. Those virally suppressed were also significantly more

175 likely to be initiated on ART the same day compared to those who were non-suppressed  
176 (aOR=1.58, CI=1.43-1.75).

177 **Fig 3. Results of the logistic regression analysis to assess association of PLHIV demographic and**  
178 **clinical variables with ART uptake (31+days vs. same day ART initiation)**

179 Figure 4 shows males were significantly more likely to not have a first viral load test compared to  
180 females (aOR=1.55, CI=1.27-1.90). Persons in WRHA were also significantly more likely not to  
181 have a viral load test compared to SERHA (aOR=01.29, CI=1.02-1.61). Persons 40+ years were  
182 significantly more likely to have a viral load test compared to 20-39 years (aOR=0.73, CI=0.58-  
183 0.90). Similarly, persons diagnosed at a late HIV stage (aOR=0.70, CI=0.57-0.86) and those  
184 located in NERHA (aOR=0.66, CI=0.41-0.85) were significantly more likely to have a viral load  
185 test compared to those diagnosed early and those located in SERHA.

186 **Fig 4. Results of the logistic regression analysis to assess association of PLHIV demographic and**  
187 **clinical variables with viral load status (viral load test vs. no viral load test)**

188  
189 **Discussion**

190 Our study shows the current goal of immediate ART initiation is gradually being met,  
191 demonstrated by a 72% increase in same day ART initiation over the five-year study period. Those  
192 initiating treatment were mostly females but males were significantly more likely to have same  
193 day initiation. Persons initiating ART later (31+ days after the first clinic visit) were mostly virally  
194 non-suppressed while those with same day initiation had achieved viral suppression at the first  
195 viral load test. This demonstrates the benefit of immediate HIV treatment. However, while  
196 immediate treatment initiation is the current goal, it is important to ensure persons are also ready  
197 to start treatment [5]. Evidence suggests rapid initiation of ART could lead to increased loss to

198 follow-up because of insufficient time to accept and disclose HIV status and to prepare for lifelong  
199 treatment[7].

200 Coverage of the first viral load test was 90% among eligible persons but declined to 79% for the  
201 second test, indicating Jamaica has adapted routine viral load testing but retention is lacking. For  
202 viral suppression to occur once on treatment, continuous engagement with care is necessary[14].  
203 WHO estimates on average, between 64% to 94% of people will still be in care one year after  
204 starting HIV treatment[15]. Considering the frequency of missing viral load tests, there is need to  
205 assess the barriers to retention and conduct routine assessment of patients with missing records to  
206 provide more robust information for quality improvement and to mitigate possible service delivery  
207 challenges.

208 Most persons were virally non-suppressed at first viral load test and had received this test between  
209 0-6 months after initiating ART, which is consistent with the current national guidelines[5].  
210 Coverage of baseline (pre-ART initiation) viral load testing was 28%, despite the national  
211 guidelines stipulating testing after persons have started treatment. Males and persons with late HIV  
212 diagnosis were significantly more likely to not have a viral load test. Males have demonstrated the  
213 tendency to delay in seeking health care[16] and persons with a late diagnosis may also be more  
214 likely to delay viral load testing. Jamaica has a decentralized health system but HIV viral load  
215 testing is only provided by the national laboratory, which limits access. UNAIDS estimates that  
216 globally 95% of HIV service delivery is currently facility based and to optimize efficiencies, it is  
217 suggested that community-based service delivery be ramped up[17]. In a previous paper[18], we  
218 suggest Jamaica explore scaling up viral load testing through decentralizing testing to treatment  
219 sites, some of which are community based. Research has also demonstrated how differentiated

220 service delivery (DSD) can be applied to improve uptake in specific populations, such as  
221 males[19,20]. Successful DSD implementation aims to simplify and adapt services to patients  
222 needs and requires that countries determine the barriers to access as well as specific needs of hard-  
223 to-reach populations to improve uptake of services[21] and consequently, health outcomes.

224 We also recommend exploring the effects of supply chain performance on ART and viral load  
225 testing uptake. A better understanding of these consumption variables at service delivery points  
226 can only serve to improve patient management and bridge the analysis gap. This has become  
227 particularly relevant within the context of the COVID-19 pandemic which saw HIV services being  
228 diverted or slowed resulting in stock outs and backlogs in viral load testing[22]. It should not be  
229 assumed that poor uptake only occurs as a result of a patient's negligence when there may be  
230 challenges within the system or supply chain[23].

231 We recognize the limitations of the data. Improved accuracy is expected if the data was normally  
232 distributed[24,25]. A recent data quality audit carried out by the HIV Strategic Information Unit  
233 measured the completeness of data in TSIS2 at 63%[12]. Missing data or non-entry of data could  
234 be responsible for persons not having a documented viral load test and not necessarily non-uptake  
235 of testing services. The data did not allow us to measure the time retained on ART, time retained  
236 in care or assess virologic failure. We are unable to relate timing of viral load test to clinic  
237 attendance or adherence. Table 3. shows 23% of persons were virally suppressed prior to ART  
238 initiation, indicating these persons may have been in treatment at clinics not included in the  
239 government data (or overseas). The data includes patients receiving both private and public care  
240 and did not attempt to separate. However, the sample size is large and includes all persons on HIV  
241 treatment for the study period, which limits selection bias. According to the c-statistic from the

242 regression analyses, the variables assessed produced strong models with 62% accuracy for viral  
243 load testing uptake and 60% accuracy for ART initiation. Medians are reported to account for  
244 skewness of the data.

245

## 246 **Conclusion**

247 The goal of immediate ART initiation is increasingly being met and is significantly associated  
248 with viral suppression at the first viral load test. Males were more likely to be initiated on ART  
249 the same day as the first clinic visit but less likely to have a viral load test after ART initiation. A  
250 qualitative assessment should be conducted to understand important challenges in accessing  
251 routine viral load testing, followed by implementation of differentiated care models targeting  
252 males.

## 253 **Financial Disclosure statement:**

254 The author(s) received no specific funding for this work.

255

256

## 257 **Acknowledgements:**

258 The authors would like to thank the HIV/STI/TB Strategic Information Unit for providing the  
259 baseline data.

260 **Acronyms**

261 ART – antiretroviral therapy,

262 PLHIV – persons living with HIV,

263 NERHA – Northeast Regional Health Authority,

264 RHA- Regional Health Authority,

265 SERHA-Southeast Regional Health Authority,

266 SRHA – Southern Regional Health Authority,

267 WRHA – Western Regional Health Authority.

268 **Data Sharing Statement**

269 The study investigator was required to sign a confidentiality agreement which prevents data

270 sharing. Full data can be requested directly from the Ministry of Health and Wellness.

271

## 272 **References**

- 273 1. Ministry of Health and Wellness. National HIV Strategic Plan 2020-2025. 2020.
- 274 2. UNAIDS. 90-90-90: An ambitious treatment target to help end the AIDS epidemic. Joint  
275 United Nations Programme on HIV/AIDS; 2014 p. 40.
- 276 3. UNAIDS. Country Factsheet: Jamaica [Internet]. 2019 [cited 2021 Feb 3]. Available from:  
277 <https://www.unaids.org/en/regionscountries/countries/jamaica>
- 278 4. Figueroa JP, Duncan JP, Bailey A, Skyers N. The HIV epidemic in Jamaica: a need to  
279 strengthen the National HIV Program. *Rev Panam Salud Pública* [Internet]. 2020 Nov 20  
280 [cited 2021 Jan 20];44. Available from:  
281 <https://www.ncbi.nlm.nih.gov/pmc/articles/PMC7679044/>
- 282 5. Ministry of Health, Jamaica. Clinical Management Of HIV Disease; Guidelines for Medical  
283 Practitioners. 2017 p. 130.
- 284 6. WHO. Consolidated guidelines on HIV testing services [Internet]. World Health  
285 Organization; 2015 [cited 2019 Apr 23]. Available from:  
286 [http://www.unaids.org/sites/default/files/media\\_asset/JC2484\\_treatment-2015\\_en\\_1.pdf](http://www.unaids.org/sites/default/files/media_asset/JC2484_treatment-2015_en_1.pdf)
- 287 7. Information NC for B, Pike USNL of M 8600 R, MD B, Usa 20894. RECOMMENDATION FOR  
288 RAPID INITIATION OF ART [Internet]. Guidelines for Managing Advanced HIV Disease and  
289 Rapid Initiation of Antiretroviral Therapy. World Health Organization; 2017 [cited 2021 Feb  
290 8]. Available from: <https://www.ncbi.nlm.nih.gov/books/NBK475972/>
- 291 8. Jamaica Gleaner. Fewer than 50% of people with HIV getting treatment. 2020 Feb 11 [cited  
292 2021 Feb 3]; Available from: [http://jamaica-gleaner.com/article/lead-  
293 stories/20200211/fewer-50-people-hiv-getting-treatment](http://jamaica-gleaner.com/article/lead-stories/20200211/fewer-50-people-hiv-getting-treatment)
- 294 9. Labhardt ND, Ringera I, Lejone TI, Klimkait T, Muhairwe J, Amstutz A, et al. Effect of Offering  
295 Same-Day ART vs Usual Health Facility Referral During Home-Based HIV Testing on Linkage  
296 to Care and Viral Suppression Among Adults With HIV in Lesotho: The CASCADE  
297 Randomized Clinical Trial. *JAMA* [Internet]. 2018 Mar 20 [cited 2021 Feb 4];319(11):1103.  
298 Available from: <http://jama.jamanetwork.com/article.aspx?doi=10.1001/jama.2018.1818>
- 299 10. Lilian RR, Rees K, McIntyre JA, Struthers HE, Peters RPH. Same-day antiretroviral therapy  
300 initiation for HIV-infected adults in South Africa: Analysis of routine data. *PLOS ONE*  
301 [Internet]. 2020 Jan 14 [cited 2021 Jan 27];15(1):e0227572. Available from:  
302 <https://journals.plos.org/plosone/article?id=10.1371/journal.pone.0227572>
- 303 11. Zadrozny, S., Weir, S., Edwards, J., & Herce, M. (2018). Applying new methods to estimate  
304 viral suppression: The “last 90.” Chapel Hill, NC, USA: MEASURE Evaluation, University of  
305 North Carolina;



- 306 12. Ministry of Health and Wellness;HIV Strategic Information Unit. Strategic Information  
307 Overview: Treatment,Care and Support Annual Review. unpublished report; 2020.
- 308 13. Awungafac G, Amin ET, Fualefac A, Takah NF, Agyingi LA, Nwobegahay J, et al. Viral load  
309 testing and the use of test results for clinical decision making for HIV treatment in  
310 Cameroon: An insight into the clinic-laboratory interface. PLoS ONE [Internet]. 2018 Jun 11  
311 [cited 2021 Jan 20];13(6). Available from:  
312 <https://www.ncbi.nlm.nih.gov/pmc/articles/PMC5995384/>
- 313 14. WHO. Updated recommendations on HIV prevention, infant diagnosis, antiretroviral  
314 initiation and monitoring: March 2021. Geneva: World Health Organization; 2021. Licence:  
315 CC BY-NC-SA 3.0 IGO. [Internet]. WHO; Available from:  
316 <https://www.who.int/publications/i/item/9789240023581>
- 317 15. The HIV treatment cascade [Internet]. Avert. 2016 [cited 2021 Sep 27]. Available from:  
318 <https://www.avert.org/professionals/hiv-programming/treatment/cascade>
- 319 16. Olanrewaju FO, Ajayi LA, Loromeke E, Olanrewaju A, Allo T, Nwannebuife O. Masculinity  
320 and men’s health-seeking behaviour in Nigerian academia. Amoo EO, editor. Cogent Soc  
321 Sci [Internet]. 2019 Jan 1 [cited 2021 Sep 27];5(1):1682111. Available from:  
322 <https://doi.org/10.1080/23311886.2019.1682111>
- 323 17. UNAIDS. 2020 Global AIDS Update — Seizing the moment — Tackling entrenched  
324 inequalities to end epidemics. 2020;384.
- 325 18. Cushnie A, Reintjes R, Lehtinen-Jacks S, Figueroa JP. HIV program outcomes for Jamaica  
326 before and after “Treat All”: A population-based study using the national treatment  
327 services database. PLOS ONE [Internet]. 2021 Aug 12 [cited 2021 Aug 12];16(8):e0255781.  
328 Available from:  
329 <https://journals.plos.org/plosone/article?id=10.1371/journal.pone.0255781>
- 330 19. Ehrenkranz P, Grimsrud A, Rabkin M. Differentiated service delivery: navigating the path to  
331 scale. Curr Opin HIV AIDS. 2019 Jan;14(1):60–5.
- 332 20. Mukumbang FC. Leaving No Man Behind: How Differentiated Service Delivery Models  
333 Increase Men’s Engagement in HIV Care. Int J Health Policy Manag [Internet]. 2020 Mar 7  
334 [cited 2021 Dec 16];10(3):129–40. Available from:  
335 <https://www.ncbi.nlm.nih.gov/pmc/articles/PMC7947905/>
- 336 21. WHO. Updated recommendations on service delivery for the treatment and care of people  
337 living with HIV. Geneva: World Health Organization; 2021. 2021.
- 338 22. A tale of two Jamaican clinics during COVID-19 [Internet]. [cited 2021 May 9]. Available  
339 from:

340 <https://www.unaids.org/en/resources/presscentre/featurestories/2020/november/20201>  
341 [103\\_jamaica](https://www.unaids.org/en/resources/presscentre/featurestories/2020/november/20201)

342 23. Nyogea DS, Said H, Mwaigomole G, Stoeckle M, Felger I, Hatz C, et al. An assessment of the  
343 supply chain management for HIV/AIDS care and treatment in Kilombero and Ulanga  
344 districts in Tanzania. *Tanzan J Health Res* [Internet]. 2015 [cited 2021 Mar 5];17(2).  
345 Available from: <https://www.ajol.info/index.php/thrb/article/view/111567>

346 24. Austin PC, Steyerberg EW. Interpreting the concordance statistic of a logistic regression  
347 model: relation to the variance and odds ratio of a continuous explanatory variable. *BMC*  
348 *Med Res Methodol* [Internet]. 2012 Jun 20 [cited 2021 Jan 28];12(1):82. Available from:  
349 <https://doi.org/10.1186/1471-2288-12-82>

350 25. Samson OO, Nyandwaki MJ, Mutwiri P, Wandera O, Oriema O, Otumba EO. The application  
351 of logistic regression in modeling of survival chances of HIV-positive patients under highly  
352 active antiretroviral therapy ( HAART ) : A Case of Nyakach District , Kenya. In 2014.

353

354

Fig 1- Proportion of PLHIV in Jamaica with same day ART initiation between 2015-2019.

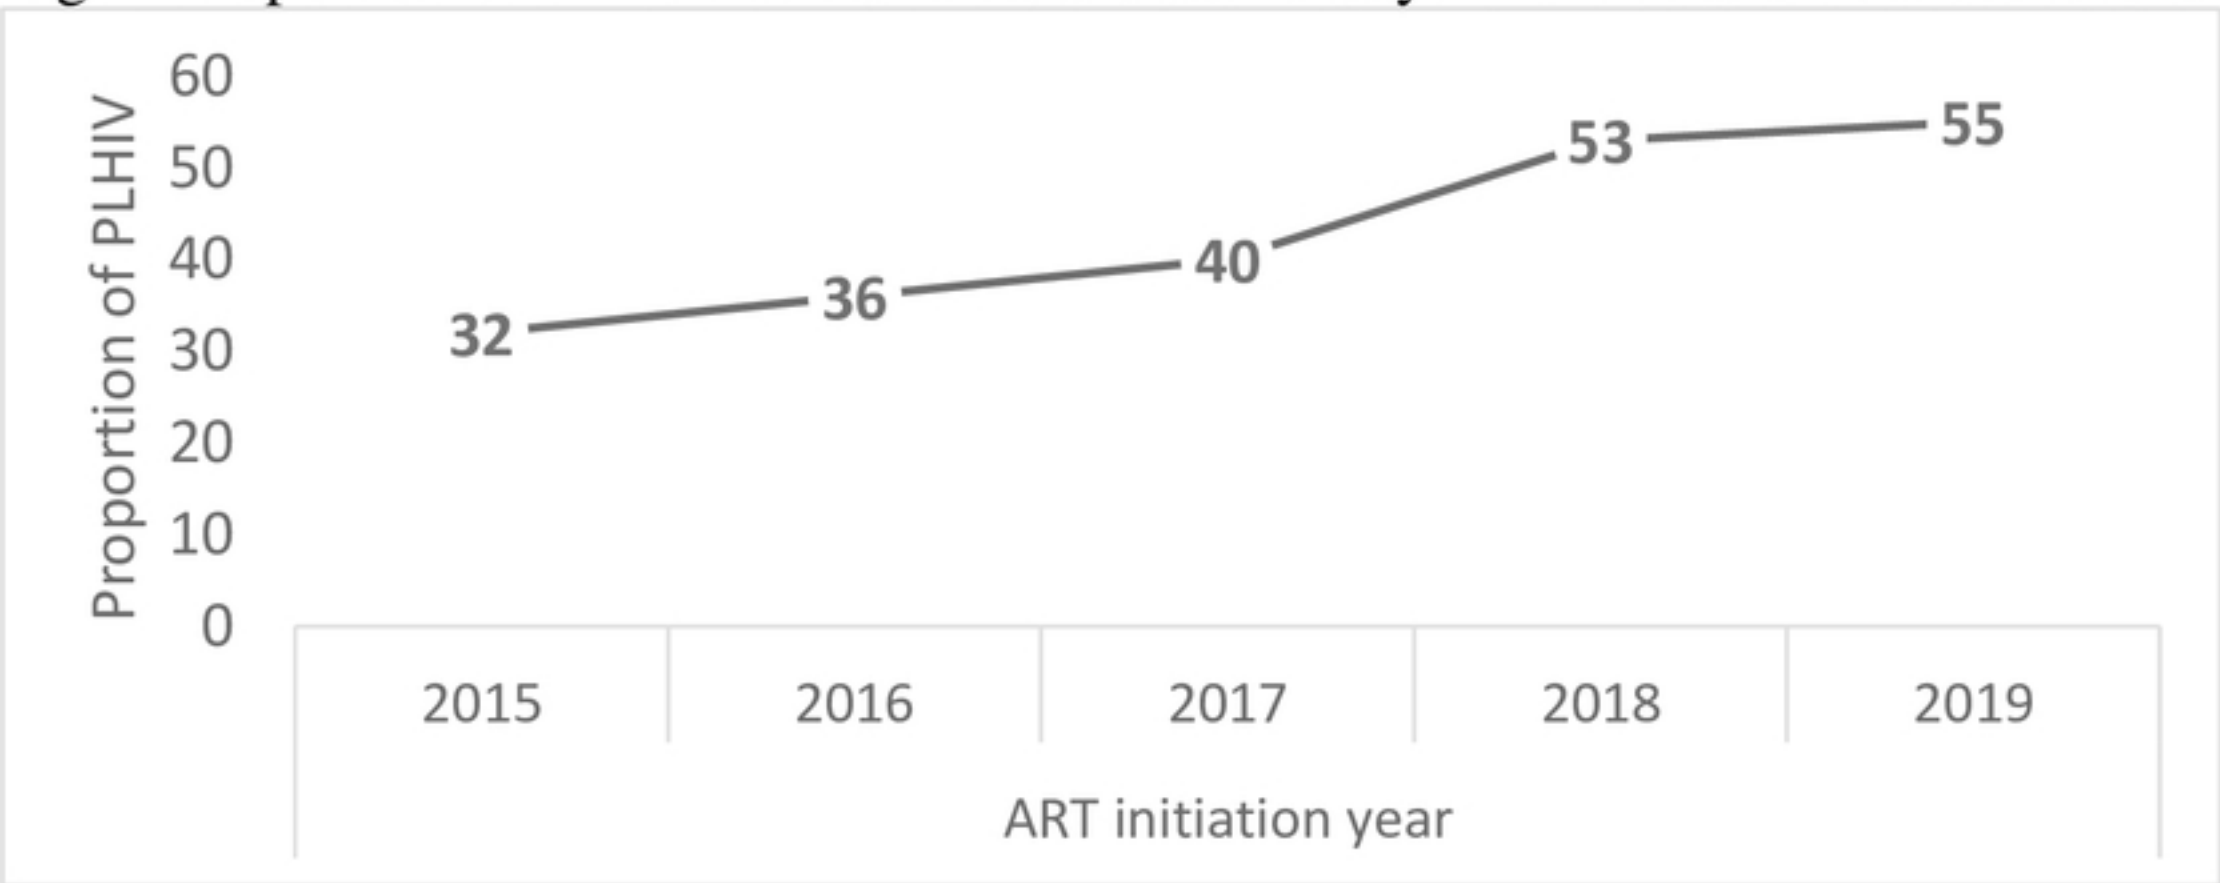

Fig 1-PLHIV with same day ART initiation

Fig 2- Viral load testing uptake among PLHIV on ART in Jamaica, from 2015-2019.

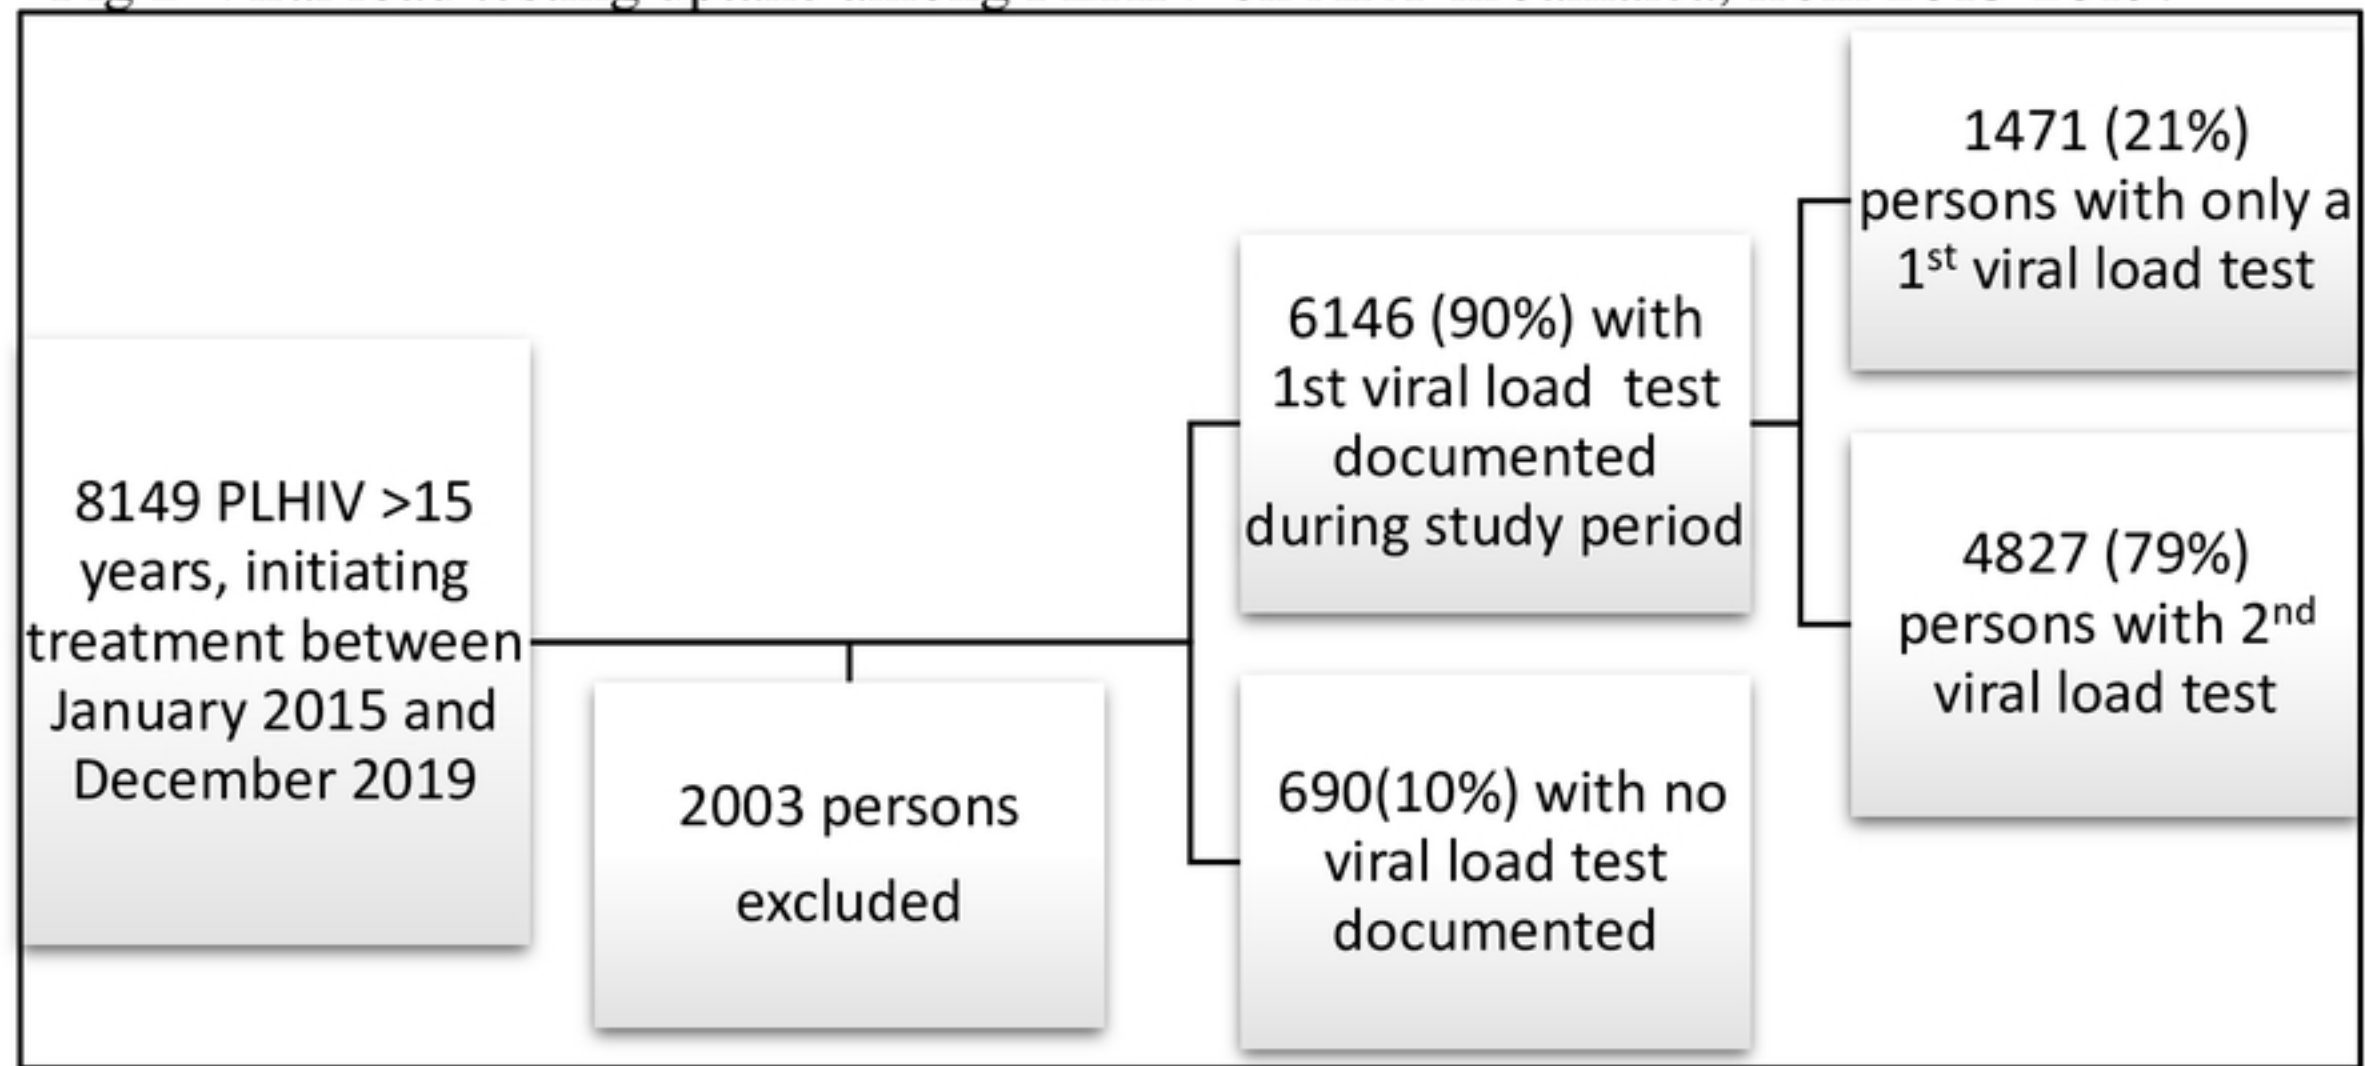

Fig 2 - Viral load testing uptake among PLHIV on ART

Fig 3-Results of the logistic regression analysis to assess association of PLHIV demographic and clinical variables with ART uptake (31+days vs. same day ART initiation)

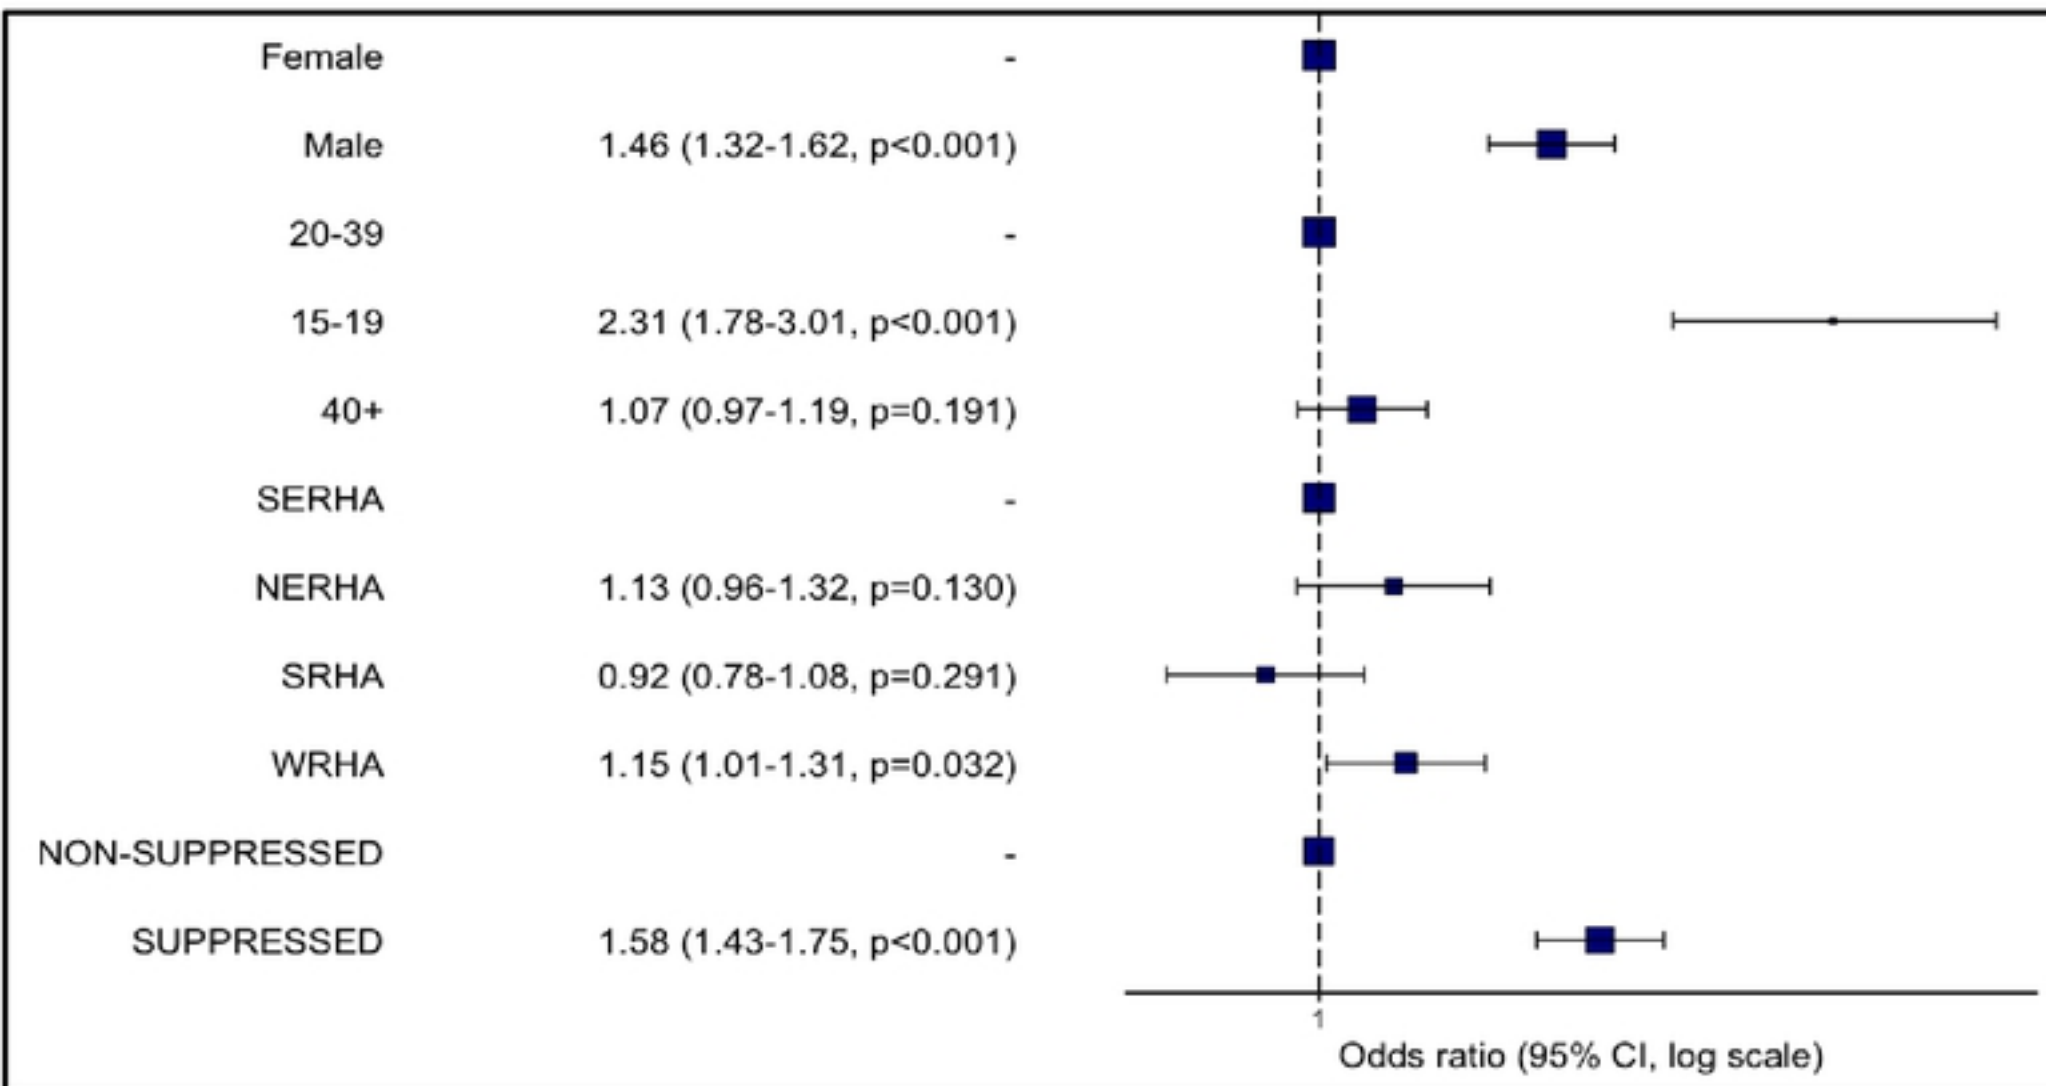

Fig 3-Adjusted odds ratios for ART uptake

Fig 4. Results of the logistic regression analysis to assess association of PLHIV demographic and clinical variables with viral load status (viral load test vs. no viral load test)

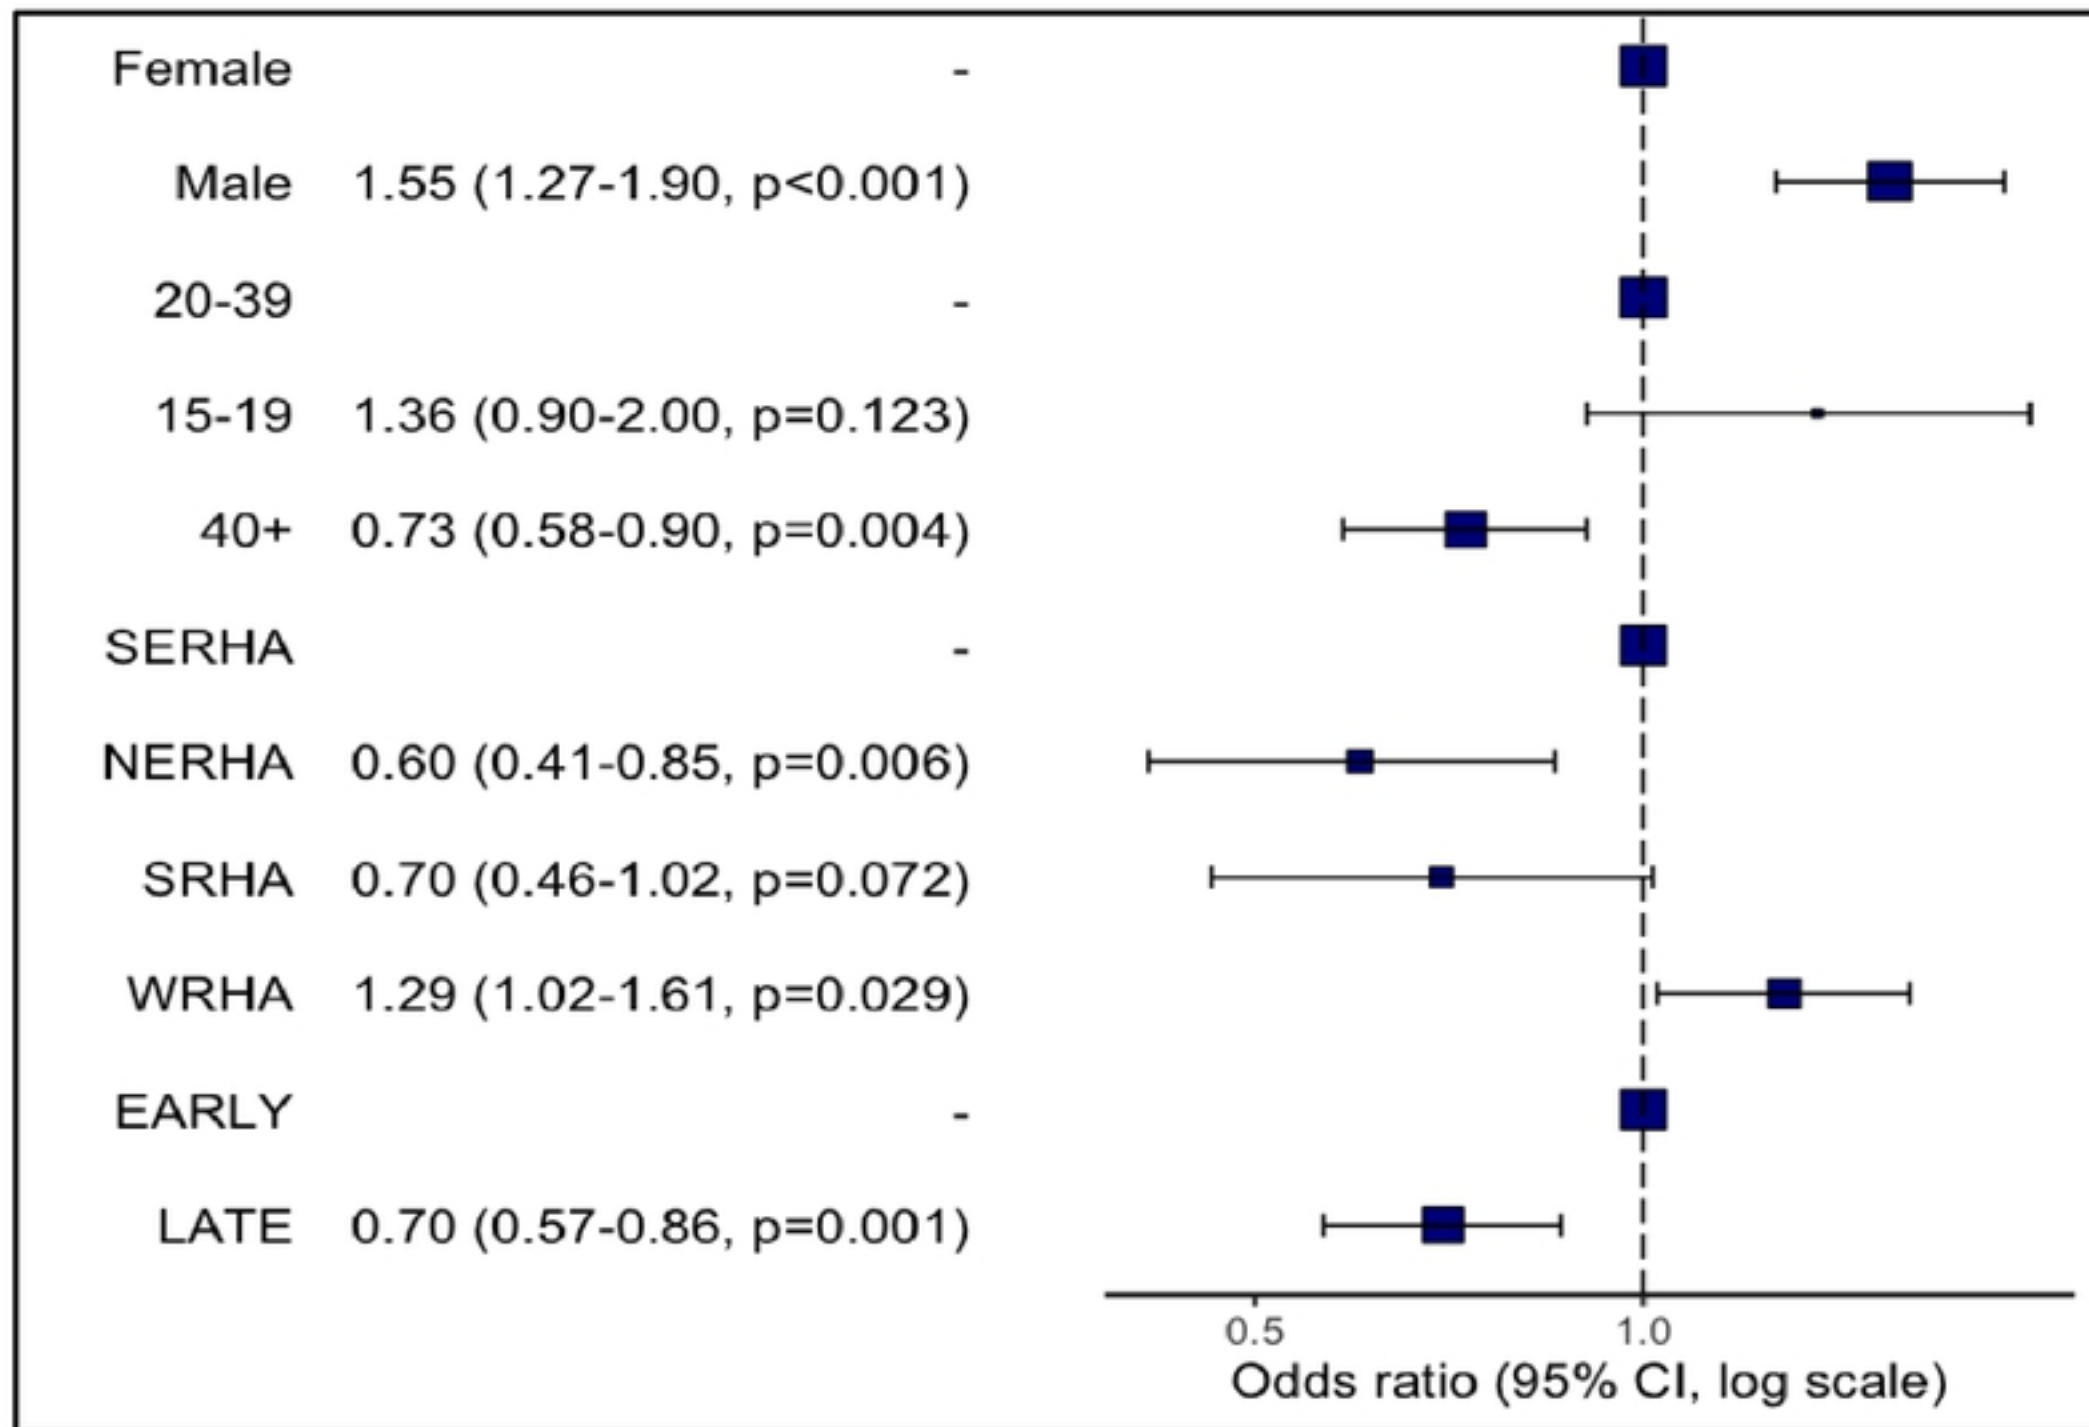

Fig 4-Adjusted odds ratios for viral load status
